## Central apneas and Ticagrelor related dyspnea in patients with acute coronary syndrome

A. Giannoni<sup>1</sup>, C. Borrelli<sup>2</sup>, F. Gentile<sup>2</sup>, G. Mirizzi<sup>2</sup>, M. Coceani<sup>2</sup>, U. Paradossi<sup>3</sup>, C. Passino<sup>1</sup>, M. Emdin<sup>1</sup>

<sup>1</sup>*Sant'Anna School of Advanced Studies, Pisa, Italy;* <sup>2</sup>*Fondazione Toscana Gabriele Monasterio, Pisa, Italy;* <sup>3</sup>*Fondazione Toscana Gabriele Monasterio, Massa, Italy*

**Funding Acknowledgement:** Type of funding source: None

**Background:** Patients treated with ticagrelor often develop dyspnea of unknown origin. We aim to explore the contribution of central apneas to ticagrelor-related dyspnea in patients with acute coronary syndrome (ACS).

**Methods:** We consecutively enrolled patients with ACS, preserved left ventricular ejection fraction and no history of obstructive sleep apnea, treated either with ticagrelor 90 mg bid (n=30) or prasugrel 10 mg od (n=24). One week after ACS onset, all patients underwent, beyond thorough cardiovascular and respiratory assessment, 24-hour cardiorespiratory monitoring and assessment of chemosensitivity to hypercapnia.

**Results:** Patients treated with ticagrelor reported more frequently dyspnea than patients treated with prasugrel (43% versus 4%, p=0.001), despite no difference in demographic, clinical, echocardiographic and pul-

monary data. Patients with dyspnea induced by ticagrelor showed higher apnea-hypopnea and central apnea index both at daytime and at nighttime compared to patients treated with ticagrelor but without dyspnea and patients treated with prasugrel (daytime AHI: 26 [7–34] vs 6 [4–14] and 6 [0–11] events/hour; nighttime AHI: 65 [17–72] vs 22 [8–37] and vs 11 [4–23] events/hour; daytime CAI: 5 [1–15] vs 1 [0–6] and 0 [0–1] events/hour; nighttime CAI 34 [2–55] vs 3 [0–9] and 0 [0–1], all p<0.05). Likewise, they also presented with higher hypercapnic ventilatory response (2.4 [1.9–2.7] vs 1.3 [1.1–1.9] and 0.9 [0.5–2.1] L/min/mmHg, all p<0.05).

**Conclusions:** Central apneas should be considered a likely mechanism of dyspnea in ACS patients treated with ticagrelor. A drug-related sensitization of the chemoreflex may be the cause of ventilatory instability in this setting.
